# Supplementary material for: Antioxidant and Antisteatotic Activities of a New Fucoidan Extracted from Ferula hermonis Roots Harvested on Lebanese Mountains
Source: PubMed Central journal article supplement (PMC7926425; doi:10.3390/molecules26041161), 2021-02-22
Supplement: molecules-26-01161-s001.pdf [file molecules-26-01161-s001.pdf]

## Supplementary Materials

# Antioxidant and antisteatotic activities of a new fucoidan extracted from *Ferula hermonis* roots harvested on Lebanese mountains

Zeinab El Rashed<sup>1,2</sup>, Giulio Lupidi<sup>3</sup>, Hussein Kanaan<sup>4</sup>, Elena Grasselli<sup>1</sup>, Laura Canesi<sup>1</sup>, Hala Khalifeh<sup>2</sup> and Ilaria Demori<sup>1\*</sup>

- <sup>1</sup> Department of Earth, Environmental and Life Sciences (DISTAV), University of Genoa, 16132 Genoa, Italy; [Zeinab.AL.Rashed94@hotmail.com](mailto:Zeinab.AL.Rashed94@hotmail.com) (Z.E.R.), [elena.grasselli@unige.it](mailto:elena.grasselli@unige.it) (E.G.), [laura.canesi@unige.it](mailto:laura.canesi@unige.it) (L.C.), [idemori@unige.it](mailto:idemori@unige.it) (I.D.)
- <sup>2</sup> Rammal Rammal Laboratory (ATAC group), Faculty of Sciences I, Lebanese University, 1003 Beirut, Lebanon; [Zeinab.AL.Rashed94@hotmail.com](mailto:Zeinab.AL.Rashed94@hotmail.com) (Z.E.R.), [hala-khalifeh@hotmail.com](mailto:hala-khalifeh@hotmail.com) (Ha.Kh)
- <sup>3</sup> School of Pharmacy, University of Camerino, 62032 Camerino, Italy; [giulio.lupidi@unicam.it](mailto:giulio.lupidi@unicam.it) (G.L.)
- <sup>4</sup> Laboratory of Chemical Synthesis and extraction of Polysaccharides from seaweed, Faculty of Pharmacy, Lebanese University, 1003 Beirut, Lebanon; [hkanaan@ul.edu.lb](mailto:hkanaan@ul.edu.lb) (Hu.Ka)

\* Correspondence: [idemori@unige.it](mailto:idemori@unige.it); Tel.: +390103538246

### FTIR spectroscopic analysis

Infrared spectroscopy (FTIR) of FUF<sub>e</sub> was recorded on a Perkin-Elmer FTIR spectrometer Spectrum Two UAT. Data were collected in the range of 4000-400 cm<sup>-1</sup>.

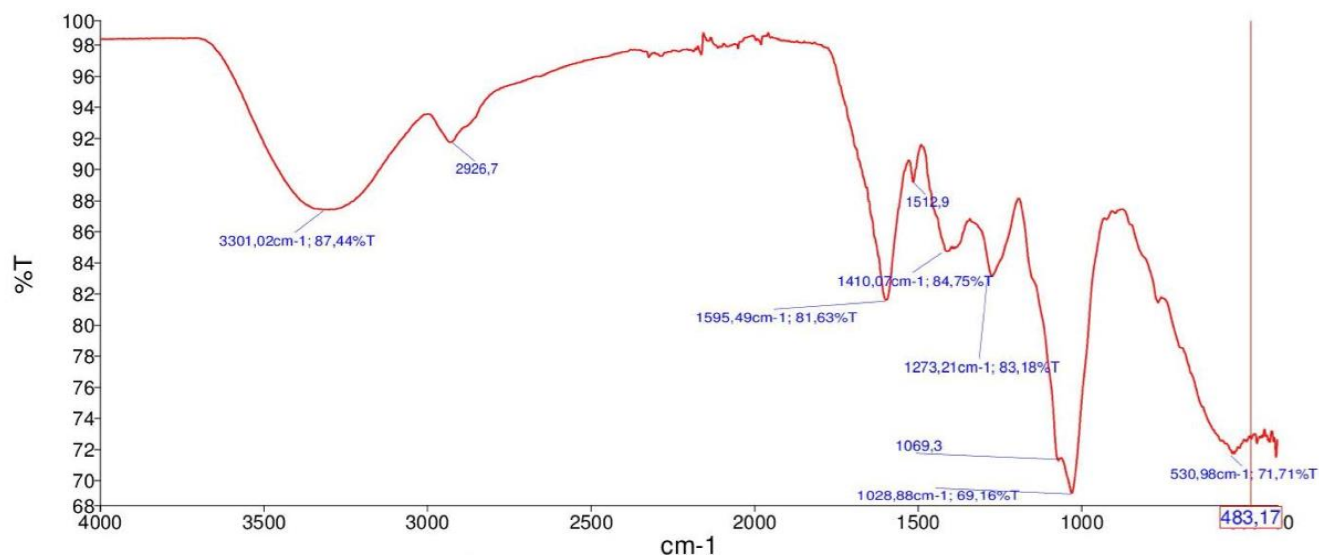

**Figure S1.** FTIR spectrum of fucoidan isolated from *F. hermonis*. %T: % Transmittance. Fourier Transform

## Nuclear magnetic resonance spectroscopy

Proton ( $^1\text{H}$  NMR) and carbon ( $^{13}\text{C}$  NMR) nuclear magnetic resonance spectroscopy were determined by analyzing NMR spectra using a Bruker Ascend 500 AVANCE III HD spectrometer. The water-soluble polysaccharide was dissolved in 99% deuterium oxide ( $\text{D}_2\text{O}$ ), and the spectra were recorded at room temperature ( $^1\text{H}$  NMR: frequency 500 MHz, acquisition time 3.27 sec;  $^{13}\text{C}$  NMR: frequency 125 MHz, acquisition time 1.1 sec).

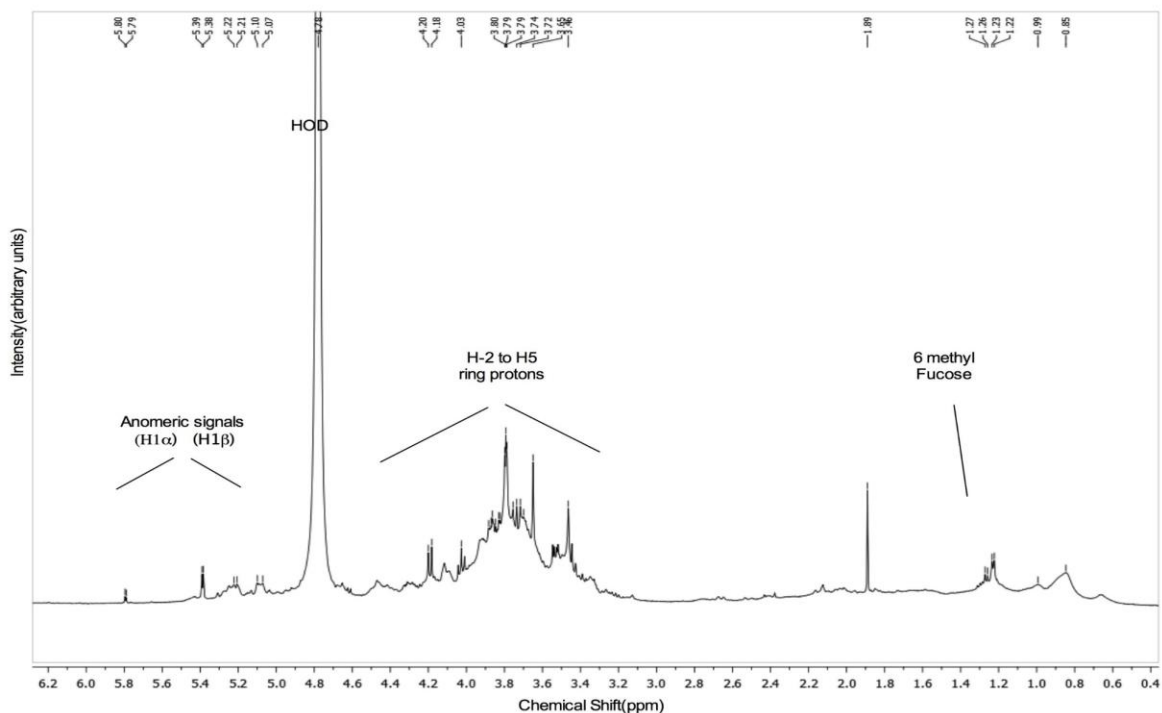

**Figure S2:**  $^1\text{H}$  NMR spectrum of fucoidan isolated from *F. hermonis*.

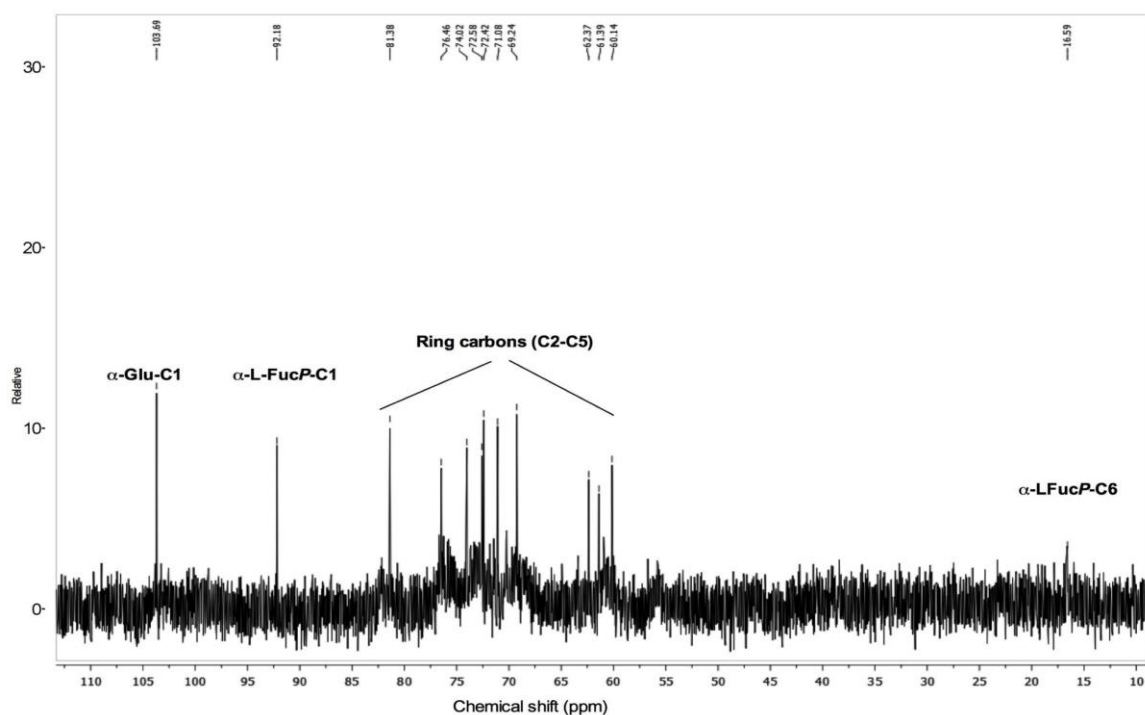

**Figure S3.**  $^{13}\text{C}$  NMR spectrum of fucoidan isolated from *F. hermonis*.

## Quantitative real-time PCR

**Table S1.** Primer pairs used for RT-qPCR analysis

| PRIMER NAME       | Primer sequence (5'→3') | Annealing T (°C) | Product length (bp) | Accession ID | Ref  |
|-------------------|-------------------------|------------------|---------------------|--------------|------|
| GAPDH Fwd         | GACCCCTTCATTGACCTCAAC   | 60               | 136                 | DQ403053     | [54] |
| GAPDH Rev         | CGCTCCTGGAAGATGGTGATGGG |                  |                     |              |      |
| PPAR $\alpha$ Fwd | CCCCACTTGAAGCAGATGACC   | 60               | 139                 | NM_013196    | [54] |
| PPAR $\alpha$ Rev | CCCTAAGTACTGGTAGTCCGC   |                  |                     |              |      |
| PPAR $\gamma$ Fwd | CGGAGTCCTCCCAGCTGTTCGCC | 60               | 116                 | Y12882       | [54] |
| PPAR $\gamma$ Rev | GGCTCATATCTGTCTCCGTCTTC |                  |                     |              |      |
| PLIN2 Fwd         | CCGAGCGTGGTGACGAGGG     | 60               | 148                 | AAH85861     | [55] |
| PLIN2 Rev         | GAGGTCACGGTCCCTACTCCC   |                  |                     |              |      |
| PLIN5 Fwd         | GGATGTCCGGTGATCAGAC     | 60               | 96                  | XM_576698    | [55] |
| PLIN5 Rev         | GTGCACGTGGCCCTGACCAG    |                  |                     |              |      |

## References

54. Grasselli, E.; Canesi, L.; Voci, A.; De Matteis, R.; Demori, I.; Fugassa, E.; Vergani, L. Effects of 3,5-diiodo-L-thyronine administration on the liver of high fat diet-fed rats. *Exp. Biol. Med.* 2008, 233, 549–557, doi:10.3181/0710-RM-266.
55. Grasselli, E.; Voci, A.; Pesce, C.; Canesi, L.; Fugassa, E.; Gallo, G.; Vergani, L. PAT protein mRNA expression in primary rat hepatocytes: Effects of exposure to fatty acids. *Int. J. Mol. Med.* 2010, 25, 505–512, doi:10.3892/ijmm\_00000370.
